# Supplementary material
Source: PubMed Central journal article supplement (PMC5651677)
Supplement: NIHMS913066-supplement-supplement_1.pdf [file NIHMS913066-supplement-supplement_1.pdf]

Table e1: Comparison of language localization by high- $\gamma$  modulation (HGM) and electrical cortical stimulation (ECS) in patients with left hemisphere electrodes according to the lobe

| Patient ID                                 | Frontal           |            |            |            | Temporal          |            |            |            |
|--------------------------------------------|-------------------|------------|------------|------------|-------------------|------------|------------|------------|
|                                            | ECS+, HGM+        | ECS+, HGM- | ECS-, HGM+ | ECS-, HGM- | ECS+, HGM+        | ECS+, HGM- | ECS-, HGM+ | ECS-, HGM- |
| L1                                         | 2                 | 4          | 5          | 18         | 0                 | 0          | 6          | 17         |
| L2                                         | 4                 | 4          | 1          | 14         | .                 | .          | .          | .          |
| L3                                         | 11                | 10         | 0          | 2          | 7                 | 14         | 0          | 11         |
| L4                                         | 2                 | 2          | 3          | 8          | 1                 | 5          | 1          | 2          |
| L5                                         | .                 | .          | .          | .          | 1                 | 2          | 2          | 8          |
| L6                                         | 5                 | 2          | 7          | 23         | 0                 | 0          | 3          | 10         |
| L7                                         | 0                 | 0          | 3          | 0          | 1                 | 0          | 3          | 8          |
| L8                                         | .                 | .          | .          | .          | 1                 | 1          | 5          | 12         |
| L9                                         | 5                 | 1          | 3          | 7          | 1                 | 1          | 1          | 4          |
| L10                                        | 6                 | 1          | 0          | 0          | 0                 | 0          | 1          | 12         |
| N=10                                       | 35                | 24         | 22         | 72         | 12                | 23         | 22         | 84         |
| Summary Statistics (95% confidence limits) |                   |            |            |            |                   |            |            |            |
| Sensitivity                                | 0.59 (0.49, 0.69) |            |            |            | 0.34 (0.21, 0.49) |            |            |            |
| Specificity                                | 0.77 (0.70, 0.83) |            |            |            | 0.79 (0.75, 0.84) |            |            |            |
| Accuracy                                   | 0.70 (0.62, 0.77) |            |            |            | 0.68 (0.62, 0.75) |            |            |            |
| MH test                                    | p<0.001           |            |            |            | p = 0.106         |            |            |            |

(Note: Patients L5 and L8 did not have any frontal lobe electrodes, whereas L2 did not have temporal lobe coverage, both naming and oral motor sites regarded as ECS+)
